# Supplementary material
Source: publisher figshare collection journal article supplement (https://asha.figshare.com/ndownloader/files/35504768)
Supplement: Supplementary file 1 [file 35504768]

### **Supplemental Material S1.** Additional resources.

- American Speech-Language-Hearing Association (ASHA) Mentoring Programs: <https://www.asha.org/students/mentoring/>
- ASHA Practice Portal: <https://www.asha.org/practice-portal/>
- CliftonStrengths: <https://www.gallup.com/cliftonstrengths>
- National Association of Teachers of Singing (NATS): <https://www.nats.org>
- Pan American Vocology Association (PAVA): <https://pavavocology.org>
- The Voice Foundation: <https://voicefoundation.org>
- Voice and Speech Trainers Association (VASTA): <https://www.vasta.org>
